# Supplementary material for: Exhausted CD8+ T cells exhibit low and strongly inhibited TCR signaling during chronic LCMV infection
Source: PubMed Central journal article supplement (PMC7479152; doi:10.1038/s41467-020-18256-4), 2020-09-08
Supplement: 41467_2020_18256_MOESM3_ESM.pdf [file 41467_2020_18256_MOESM3_ESM.pdf]

## Reporting Summary

Nature Research wishes to improve the reproducibility of the work that we publish. This form provides structure for consistency and transparency in reporting. For further information on Nature Research policies, see our [Editorial Policies](#) and the [Editorial Policy Checklist](#).

### Statistics

For all statistical analyses, confirm that the following items are present in the figure legend, table legend, main text, or Methods section.

n/a Confirmed

- The exact sample size ( $n$ ) for each experimental group/condition, given as a discrete number and unit of measurement
- A statement on whether measurements were taken from distinct samples or whether the same sample was measured repeatedly
- The statistical test(s) used AND whether they are one- or two-sided  
*Only common tests should be described solely by name; describe more complex techniques in the Methods section.*
- A description of all covariates tested
- A description of any assumptions or corrections, such as tests of normality and adjustment for multiple comparisons
- A full description of the statistical parameters including central tendency (e.g. means) or other basic estimates (e.g. regression coefficient) AND variation (e.g. standard deviation) or associated estimates of uncertainty (e.g. confidence intervals)
- For null hypothesis testing, the test statistic (e.g.  $F$ ,  $t$ ,  $r$ ) with confidence intervals, effect sizes, degrees of freedom and  $P$  value noted  
*Give  $P$  values as exact values whenever suitable.*
- For Bayesian analysis, information on the choice of priors and Markov chain Monte Carlo settings
- For hierarchical and complex designs, identification of the appropriate level for tests and full reporting of outcomes
- Estimates of effect sizes (e.g. Cohen's  $d$ , Pearson's  $r$ ), indicating how they were calculated

*Our web collection on [statistics for biologists](#) contains articles on many of the points above.*

### Software and code

Policy information about [availability of computer code](#)

Data collection Data were collected using BD FACSDiva (v8.0.1) and LSRII, Canto or Fortessa cytometers. Sequencing data was generated on Illumina platform.

Data analysis Flow cytometry data were analyzed in Flowjo (versions 10.6.1 and 9). Data was exported into Graphpad prism (version 8.2.0) for statistical analysis. Sequencing data were mapped with STAR aligner and analyzed with DESeq2 in R (3.6.0). Custom scripts are available here: [https://gitlab.com/claassen\\_lab/tcrsignaling](https://gitlab.com/claassen_lab/tcrsignaling)

For manuscripts utilizing custom algorithms or software that are central to the research but not yet described in published literature, software must be made available to editors and reviewers. We strongly encourage code deposition in a community repository (e.g. GitHub). See the Nature Research [guidelines for submitting code & software](#) for further information.

### Data

Policy information about [availability of data](#)

All manuscripts must include a [data availability statement](#). This statement should provide the following information, where applicable:

- Accession codes, unique identifiers, or web links for publicly available datasets
- A list of figures that have associated raw data
- A description of any restrictions on data availability

The RNAseq raw data files can be found at the European Nucleotide Archive under accession number #PRJEB38896 (<https://www.ebi.ac.uk/ena/browser/view/PRJEB38896>). The flow cytometry files supporting the findings are available from the corresponding author upon request. The source data underlying F1a, 2b-d, 3, 4c, 5c, d, 6c-e, 7 c, e-g, Supplementary Figs. 1a, d, 2, 3a-c, 4b-d, 5c-e, 6a-c, 7b are provided in the Source Data File.

## Field-specific reporting

Please select the one below that is the best fit for your research. If you are not sure, read the appropriate sections before making your selection.

- Life sciences       Behavioural & social sciences       Ecological, evolutionary & environmental sciences

For a reference copy of the document with all sections, see [nature.com/documents/nr-reporting-summary-flat.pdf](https://www.nature.com/documents/nr-reporting-summary-flat.pdf)

## Life sciences study design

All studies must disclose on these points even when the disclosure is negative.

|                 |                                                                                                                                                                                                                                                                                                                                                                                   |
|-----------------|-----------------------------------------------------------------------------------------------------------------------------------------------------------------------------------------------------------------------------------------------------------------------------------------------------------------------------------------------------------------------------------|
| Sample size     | Between 3-4 mice were used per group within each experiment. This number was based on previous experience with the infection model (Agnellini et al. (2007), Blackburn et al. (2008)), the availability of the mice, and feasibility of the experiment.                                                                                                                           |
| Data exclusions | Samples with fewer than 50 cells of interest (in this case transgenic P14 cells) were excluded because this threshold for analysis was pre-established. This was the case for 2 samples (out of 4) isolated from the liver 4 wpi in Supplementary Figure 1d and Supplementary Figure 3c and a sample isolated from kidney 3 weeks post acute infection in Supplementary Figure 2. |
| Replication     | Experiments (except the RNAseq experiment shown in Fig. 1) were performed at least twice with similar conditions and considered reproducible if results were comparable.                                                                                                                                                                                                          |
| Randomization   | Mice were randomly distributed amongst groups at the start of each experiment.                                                                                                                                                                                                                                                                                                    |
| Blinding        | Blinding was not performed, due to technical reasons. For in vivo experiments it is required by local authorities to write on the cage cards all procedures the mice are subjected to.                                                                                                                                                                                            |

## Reporting for specific materials, systems and methods

We require information from authors about some types of materials, experimental systems and methods used in many studies. Here, indicate whether each material, system or method listed is relevant to your study. If you are not sure if a list item applies to your research, read the appropriate section before selecting a response.

### Materials & experimental systems

- |                                     |                                                                 |
|-------------------------------------|-----------------------------------------------------------------|
| n/a                                 | Involved in the study                                           |
| <input type="checkbox"/>            | <input checked="" type="checkbox"/> Antibodies                  |
| <input type="checkbox"/>            | <input checked="" type="checkbox"/> Eukaryotic cell lines       |
| <input checked="" type="checkbox"/> | <input type="checkbox"/> Palaeontology and archaeology          |
| <input type="checkbox"/>            | <input checked="" type="checkbox"/> Animals and other organisms |
| <input checked="" type="checkbox"/> | <input type="checkbox"/> Human research participants            |
| <input checked="" type="checkbox"/> | <input type="checkbox"/> Clinical data                          |
| <input checked="" type="checkbox"/> | <input type="checkbox"/> Dual use research of concern           |

### Methods

- |                                     |                                                    |
|-------------------------------------|----------------------------------------------------|
| n/a                                 | Involved in the study                              |
| <input checked="" type="checkbox"/> | <input type="checkbox"/> ChIP-seq                  |
| <input type="checkbox"/>            | <input checked="" type="checkbox"/> Flow cytometry |
| <input checked="" type="checkbox"/> | <input type="checkbox"/> MRI-based neuroimaging    |

## Antibodies

### Antibodies used

| Marker | Fluorophore | Supplier       | Catalog number | Clone        | Purpose          | Dilution     | Reactivity |
|--------|-------------|----------------|----------------|--------------|------------------|--------------|------------|
| B220   | Biotin      | BioLegend      | 103204         | RA3-6B2      | Enrichment       | 1/100        | Mouse      |
| CD107a | PE          | BioLegend      | 121612         | 1D4B         | Flow             | 1/1000       | Mouse      |
| CD39   | AF647       | BioLegend      | 143807         | Duha59       | Flow             | 1/200        | Mouse      |
| CD4    | biotin      | BioLegend      | 100404         | GK1.5        | Flow             | 1/200        | Mouse      |
| CD44   | BV510       | BioLegend      | 102116         | IM7          | Flow             | 1/200        | Mouse      |
| CD45   | PerCP       | BD Biosciences | 557235         | 30-F11       | Flow             | 1/200        | Mouse      |
| CD45.1 | APC         | BioLegend      | 110714         | A20          | Flow             | 1/200        | Mouse      |
| CD45.1 | BV421       | BioLegend      | 110731         | A20          | Flow             | 1/200        | Mouse      |
| CD45.1 | PB          | BioLegend      | 110722         | A20          | Flow             | 1/200        | Mouse      |
| CD45.1 | PB          | BioLegend      | 110722         | A20          | Flow             | 1/200        | Mouse      |
| CD45.1 | PE          | BioLegend      | 110708         | A20          | Flow             | 1/200        | Mouse      |
| CD45.1 | BV711       | BioLegend      | 110739         | A20          | Flow             | 1/200        | Mouse      |
| CD45.2 | Percp       | BioLegend      | 109825         | 104          | Flow             | 1/200        | Mouse      |
| CD45.2 | BV421       | BioLegend      | 109831         | 104          | Flow             | 1/200        | Mouse      |
| CD8    | Percp       | BioLegend      | 100732         | 53-6.7       | Flow             | 1/200        | Mouse      |
| CD8    | BV605       | BioLegend      | 100744         | 53-6.7       | Flow             | 1/200        | Mouse      |
| CD8    | BUV395      | BioLegend      | 102116         | 53-6.7       | Flow             | 1/200        | Mouse      |
| CD8    | BV711       | BioLegend      | 100714         | 53-6.7       | Flow             | 1/200        | Mouse      |
| CTLA-4 | -           | BioXcell       | BE0032         | UC10-4F10-11 | in vivo blocking | 200 ug/mouse | Mouse      |

CX3CR1 PerCPCy5.5 BioLegend 149010 SA011F11 Flow 1/200 Mouse  
 CXCR6 PE BioLegend 151104 SA051D1 Flow 1/200 Mouse  
 IFNg PB BioLegend 505818 XMG1.2 Flow 1/200 Mouse  
 LAG-3 - BioXcell BE0174 C9B7W in vivo blocking 200 ug/mouse Mouse  
 PD-1 PECy7 BioLegend 135215 29F.1A12 Flow 1/200 Mouse  
 PD-1 BV605 BioLegend 135219 29F.1A12 Flow 1/200 Mouse  
 PD-L1 BV421 BioLegend 124315 10F.9G2 Flow 1/200 Mouse  
 PD-L1 PE BioLegend 124308 10F.9G2 Flow 1/200 Mouse  
 PD-L1 - BioXcell BE00101 10F.9G2 in vivo blocking 200 ug/mouse Mouse  
 TIGIT - provided by Dr. Nicole Joller (UZH) - 1B4 in vivo blocking 200 ug/mouse Mouse  
 Tim-3 PE BioLegend 119703 RMT3-23 Flow 1/200 Mouse  
 TIM-3 - BioXcell BE0115 RMT3-23 in vivo blocking 200 ug/mouse Mouse  
 VL4 FITC Generated in-house - - Flow/Focus Forming Assay 1/50 Mouse  
 CD28 - BioLegend 102112 37.51 in vitro restimulation 1 ug/mL Mouse  
 CD3 - BioLegend 100340 145-2C11 in vitro restimulation 1 ug/mL Mouse

## Validation

The table below contains the validation performed by the manufacturer:

| Supplier       | Catalog number | Clone        | Validation                                                                                                                                 | manufacturer |
|----------------|----------------|--------------|--------------------------------------------------------------------------------------------------------------------------------------------|--------------|
| BioLegend      | 103204         | RA3-6B2      | Staining on C57BL/6 mouse splenocytes                                                                                                      |              |
| BioLegend      | 121612         | 1D4B         | Thioglycollate-elicited BALB/c mouse peritoneal macrophages                                                                                |              |
| BioLegend      | 143807         | Duha59       | Staining on C57BL/6 mouse splenocytes                                                                                                      |              |
| BioLegend      | 100404         | GK1.5        | Staining on C57BL/6 mouse splenocytes                                                                                                      |              |
| BioLegend      | 102116         | IM7          | Staining on C57BL/6 mouse splenocytes                                                                                                      |              |
| BD Biosciences | 557235         | 30-F11       | This antibody has been tested by immunofluorescent staining by flow cytometric analysis.                                                   |              |
| BioLegend      | 110714         | A20          | Staining on C57BL/6 mouse splenocytes                                                                                                      |              |
| BioLegend      | 110731         | A20          | Staining on C57BL/6 mouse splenocytes                                                                                                      |              |
| BioLegend      | 110722         | A20          | Staining on C57BL/6 mouse splenocytes                                                                                                      |              |
| BioLegend      | 110722         | A20          | Staining on C57BL/6 mouse splenocytes                                                                                                      |              |
| BioLegend      | 110708         | A20          | Staining on C57BL/6 mouse splenocytes                                                                                                      |              |
| BioLegend      | 110739         | A20          | Staining on C57BL/6 mouse splenocytes                                                                                                      |              |
| BioLegend      | 109825         | 104          | Staining on C57BL/6 mouse splenocytes                                                                                                      |              |
| BioLegend      | 109831         | 104          | Staining on C57BL/6 mouse splenocytes                                                                                                      |              |
| BioLegend      | 100732         | 53-6.7       | Staining on C57BL/6 mouse splenocytes                                                                                                      |              |
| BioLegend      | 100744         | 53-6.7       | Staining on C57BL/6 mouse splenocytes                                                                                                      |              |
| BioLegend      | 102116         | 53-6.7       | Staining on C57BL/6 mouse splenocytes                                                                                                      |              |
| BioLegend      | 100714         | 53-6.7       | Staining on C57BL/6 mouse splenocytes                                                                                                      |              |
| BioXcell       | BE0032         | UC10-4F10-11 | Western Blot staining of purified CTLA-4                                                                                                   |              |
| BioLegend      | 149010         | SA011F11     | Staining on C57BL/6 mouse splenocytes                                                                                                      |              |
| BioLegend      | 151104         | SA051D1      | Staining on C57BL/6 mouse splenocytes                                                                                                      |              |
| BioLegend      | 505818         | XMG1.2       | PMA and Ionomycin-stimulated (6hrs) BALB/c splenocytes                                                                                     |              |
| BioXcell       | BE0174         | C9B7W        | Western Blot staining of purified LAG-3                                                                                                    |              |
| BioLegend      | 135215         | 29F.1A12     | Con-A stimulated C57BL/6 mouse splenocytes                                                                                                 |              |
| BioLegend      | 135219         | 29F.1A12     | Con-A stimulated C57BL/6 splenocytes                                                                                                       |              |
| BioLegend      | 124315         | 10F.9G2      | Staining on C57BL/6 mouse splenocytes                                                                                                      |              |
| BioLegend      | 124308         | 10F.9G2      | Staining on C57BL/6 mouse splenocytes                                                                                                      |              |
| BioXcell       | BE00101        | 10F.9G2      | Western Blot staining of purified PD-L1                                                                                                    |              |
|                |                |              | provided by Dr. Nicole Joller (UZH) - 1B4 Dixon et al. (2018)                                                                              |              |
| BioLegend      | 119703         | RMT3-23      | Mouse TIM-3 transfected cells stained with anti-mouse CD366                                                                                |              |
| BioXcell       | BE0115         | RMT3-23      | Western Blot staining of purified TIM-3                                                                                                    |              |
|                |                |              | Generated in-house - - Staining of splenocytes from a chronically infected mouse with LCMV and splenocytes from a naïve (uninfected) mouse |              |
| BioLegend      | 102112         | 37.51        | Staining on C57BL/6 mouse splenocytes                                                                                                      |              |
| BioLegend      | 100340         | 145-2C11     | Staining on C57BL/6 mouse splenocytes                                                                                                      |              |

## Eukaryotic cell lines

Policy information about [cell lines](#)

|                                                                   |                                                                                                                                                                          |
|-------------------------------------------------------------------|--------------------------------------------------------------------------------------------------------------------------------------------------------------------------|
| Cell line source(s)                                               | BHK21 [C13] (ATCC® CCL10), MC57G (ATCC® CRL-2295), VL-4 hybridoma Cat#:006A-EVA92, EL4 (ATCC® TIB-39™)                                                                   |
| Authentication                                                    | The cell lines were not authenticated in our lab.                                                                                                                        |
| Mycoplasma contamination                                          | Cell lines used for virus and antibody production (BHK-21 and VL-4 hybridoma) were free of Mycoplasma contamination. MC57G and EL4 cells tested positive for mycoplasma. |
| Commonly misidentified lines (See <a href="#">ICLAC</a> register) | No commonly misidentified cell lines were used in the study.                                                                                                             |

## Animals and other organisms

Policy information about [studies involving animals](#); [ARRIVE guidelines](#) recommended for reporting animal research

|                         |                                                                                                                                                                                                                                                                                                                                                                                                                                                                                                                                                            |
|-------------------------|------------------------------------------------------------------------------------------------------------------------------------------------------------------------------------------------------------------------------------------------------------------------------------------------------------------------------------------------------------------------------------------------------------------------------------------------------------------------------------------------------------------------------------------------------------|
| Laboratory animals      | Wild-type CC57BL/6J males purchased from Janvier Elevage, Nr4a1-GFP mice expressing a GFP under the control of the NUR77 promoter, Tcf7-GFP mice expressing GFP under the control of Tcf7 (encoding TCF1) promoter, P14 transgenic (CD45.1) mice expressing a TCR specific for LCMV peptide GP33–41 were housed at 24°C and 50% humidity and bred under specific pathogen-free conditions. Mice were exposed to a 12:12h light-dark cycle with unrestricted access to water and food. Mice were between 6-16 weeks of age at the start of each experiment. |
| Wild animals            | No wild animals were used in the study.                                                                                                                                                                                                                                                                                                                                                                                                                                                                                                                    |
| Field-collected samples | No field collected samples were used in the study.                                                                                                                                                                                                                                                                                                                                                                                                                                                                                                         |
| Ethics oversight        | This study was conducted in accordance to the guidelines of the animal experimentation law (SR 455.163; TVV) of the Swiss Federal Government. The protocol was approved by Cantonal Veterinary Office of the canton Zurich, Switzerland (experimental permits 147/2014, 115/2017).                                                                                                                                                                                                                                                                         |

Note that full information on the approval of the study protocol must also be provided in the manuscript.

## Flow Cytometry

### Plots

Confirm that:

- The axis labels state the marker and fluorochrome used (e.g. CD4-FITC).
- The axis scales are clearly visible. Include numbers along axes only for bottom left plot of group (a 'group' is an analysis of identical markers).
- All plots are contour plots with outliers or pseudocolor plots.
- A numerical value for number of cells or percentage (with statistics) is provided.

### Methodology

|                           |                                                                                                                                                                                                                                                                                                                                                                                                                                                                                                                                                                                                                                                                                                                                                                                                                                                                                                                                                                                                                                                                                                                                                                                                                                                                                                                            |
|---------------------------|----------------------------------------------------------------------------------------------------------------------------------------------------------------------------------------------------------------------------------------------------------------------------------------------------------------------------------------------------------------------------------------------------------------------------------------------------------------------------------------------------------------------------------------------------------------------------------------------------------------------------------------------------------------------------------------------------------------------------------------------------------------------------------------------------------------------------------------------------------------------------------------------------------------------------------------------------------------------------------------------------------------------------------------------------------------------------------------------------------------------------------------------------------------------------------------------------------------------------------------------------------------------------------------------------------------------------|
| Sample preparation        | Mice were sacrificed with carbon dioxide. Blood was taken from the heart or vena cava. The mice were then perfused with 20 mL PBS, and organs (spleen, bone marrow, lymph nodes, lung, liver, and kidney) were isolated. Lungs, liver, and kidney were cut into pieces and digested in complete RPMI (Bioconcept) (RPMI-1640 containing 10% fetal bovine serum (Omnilab), 2 mM L-glutamine (Gibco), 1% penicillin-streptomycin (Gibco), 1 mM sodium pyruvate (Gibco), 50 nM betamercapthoethanol, 0.1 mM non-essential (glycine, L-alanine, L-asparagine, L-aspartic acid, L-glutamic acid, L-proline, L-serine) amino acids (Gibco), 20 mM HEPES (Gibco)) supplemented with 2.4 mg/ml collagenase type I (Gibco), and 0.2 mg/ml DNase I (Roche Diagnostics, Rotkreuz, Switzerland) for 30 minutes at 37°C. Spleens and lymph nodes were mashed through 70 µm filter with a syringe (1 mL) plunger. Cell suspensions were filtered (70 µm) and treated with ammonium-chloride-potassium buffer (150 mM NH <sub>4</sub> Cl, 10 mM KHCO <sub>3</sub> , 0.1 mM EDTA in water) to lyse erythrocytes for 5 min at room temperature. Cell suspension from lungs, liver, and kidney were enriched for lymphocytes by centrifugation over Percoll density centrifugation (30% (v/v) Percoll in PBS) at 4°C (500 g) for 30 minutes. |
| Instrument                | Multi-parametric flow cytometric data was acquired using LSRII, Canto or Fortessa flow cytometers (BD Biosciences).                                                                                                                                                                                                                                                                                                                                                                                                                                                                                                                                                                                                                                                                                                                                                                                                                                                                                                                                                                                                                                                                                                                                                                                                        |
| Software                  | Flow cytometry data were analyzed in Flowjo (versions 10.6.1 and 9). Data was exported into Graphpad prism (version 8.2.0). Sequencing data were analyzed in R with limma, DEseq2, ggplot2 packages.                                                                                                                                                                                                                                                                                                                                                                                                                                                                                                                                                                                                                                                                                                                                                                                                                                                                                                                                                                                                                                                                                                                       |
| Cell population abundance | Purity of the sorted P14 cells used for RNAseq was above 95% (as determined by flow cytometry post-sort).                                                                                                                                                                                                                                                                                                                                                                                                                                                                                                                                                                                                                                                                                                                                                                                                                                                                                                                                                                                                                                                                                                                                                                                                                  |
| Gating strategy           | For all samples the following gating strategy was used: leukocytes (SSC-A/FSC-A), exclusion of doublets (FSC-H/FSC-A and SSC-H/SSC-A), alive cells (Near IR/FSC-A).<br>For P14 staining, cells were gated on CD8 (FSC-A/CD8 gate), then CD45.1 (CD8/CD45.1 gate).<br>For hematopoietic or non-hematopoietic populations, a wider FSC-A/SSC-A gate was used (including all cells). TO distinguish the hematopoietic from the non-hematopoietic fraction, CD45 and CD45.2 staining was used.<br>Nr4a1-GFP gates were set using endogenous CD8 cells (gated on alive single CD8+ cells) not expressing the transgene from the same mouse. Inhibitory receptor gates (PD-1, CD39, TIM-3) were set on endogenous CD8 cell population where distinct populations could be clearly identified.<br>VL4-FITC gates were determined by using a control (uninfected) mouse.                                                                                                                                                                                                                                                                                                                                                                                                                                                           |

- Tick this box to confirm that a figure exemplifying the gating strategy is provided in the Supplementary Information.
